# Supplementary material for: Highly selective sensing of Fe3+/Hg2+ and proton conduction using two fluorescent Zn(ii) coordination polymers
Source: Royal Society of Chemistry journal article supplement (doi:10.1039/d0dt02327b), 2020-01-01
Supplement: d0dt02327b1.pdf [file d0dt02327b1.pdf]

# Electronic supplementary materials

## Highly selective sensing of Fe<sup>3+</sup>/Hg<sup>2+</sup> and proton conduction using two fluorescent Zn(II) coordination polymers

Tian-Yang Xu<sup>a,b</sup>, Hong-Jiao Nie<sup>c\*</sup>, Jia-Ming Li<sup>a\*</sup>, Zhong-Feng Shi<sup>a,b\*</sup>

<sup>a</sup> Guangxi Colleges and Universities Key Laboratory of Beibu Gulf Oil and Natural Gas Resource Effective Utilization, College of Petroleum and Chemical Engineering, Beibu Gulf University, Qinzhou 535011 People's Republic of China

<sup>b</sup> School of Chemistry and Pharmacy, Guangxi Normal University, Key Laboratory for the Chemistry and Molecular Engineering of Medicinal Resources (Ministry of Education), Guilin 541004 People's Republic of China

<sup>c</sup> Key Laboratory of Functional Nanomaterials and Technology in Universities of Shandong, School of Chemistry and Chemical Engineering, Linyi University, Linyi 276000 People's Republic of China

\*Corresponding authors: Jia-Ming Li, e-mail: [jmli@bbgu.edu.cn](mailto:jmli@bbgu.edu.cn); Hong-Jiao Nie, e-mail: [niehongjiao@lyu.edu.cn](mailto:niehongjiao@lyu.edu.cn); Zhong-Feng Shi, e-mail: [shizhongfeng01@163.com](mailto:shizhongfeng01@163.com)

**Table S1.** Selected Bond lengths [Å] and angles [°] for polymer **1** and **2**.

| Polymer 1                |             |                                          |             |
|--------------------------|-------------|------------------------------------------|-------------|
| Zn1—O1                   | 1.9635 (18) | Zn1—N1                                   | 2.007 (2)   |
| Zn1—O4 <sup>i</sup>      | 1.9852 (19) | Zn1—N4 <sup>ii</sup>                     | 1.998 (2)   |
| O1—Zn1—O4 <sup>i</sup>   | 108.43 (8)  | O4 <sup>i</sup> —Zn1—N4 <sup>ii</sup>    | 103.37 (8)  |
| O1—Zn1—N4 <sup>ii</sup>  | 122.61 (8)  | O4 <sup>i</sup> —Zn1—N1                  | 112.60 (8)  |
| O1—Zn1—N1                | 100.80 (8)  | N4 <sup>ii</sup> —Zn1—N1                 | 109.29 (9)  |
| Polymer 2                |             |                                          |             |
| Zn1—O9                   | 1.969 (2)   | Zn3—N1                                   | 1.988 (3)   |
| Zn1—O                    | 2.079 (2)   | Zn3—N12 <sup>ii</sup>                    | 2.025 (3)   |
| Zn1—O1                   | 2.075 (2)   | Zn3—N4 <sup>iii</sup>                    | 1.995 (3)   |
| Zn1—O3                   | 1.966 (2)   | Zn2—O10                                  | 1.966 (3)   |
| Zn1—N8 <sup>i</sup>      | 2.048 (3)   | Zn2—O8 <sup>iv</sup>                     | 1.963 (2)   |
| Zn3—O2                   | 1.992 (3)   | Zn2—N9                                   | 1.998 (3)   |
| Zn3—N5                   | 1.996 (3)   |                                          |             |
| O9—Zn1—O7                | 87.30 (9)   | O2—Zn3—N12 <sup>ii</sup>                 | 105.71 (11) |
| O9—Zn1—O1                | 88.38(10)   | O2—Zn3—N4 <sup>iii</sup>                 | 104.59 (13) |
| O9—Zn1—N8 <sup>i</sup>   | 116.90 (12) | N1—Zn3—O2                                | 111.14 (12) |
| O1—Zn1—O7                | 168.39 (10) | N1—Zn3—N12 <sup>ii</sup>                 | 106.35 (12) |
| O3—Zn1—O9                | 136.69 (11) | N1—Zn3—N4 <sup>iii</sup>                 | 121.07 (12) |
| O3—Zn1—O7                | 88.35 (10)  | N4 <sup>iii</sup> —Zn3—N12 <sup>ii</sup> | 106.99 (12) |
| O3—Zn1—O1                | 87.42 (10)  | O10—Zn2—N9                               | 113.12 (12) |
| O3—Zn1—N8 <sup>i</sup>   | 106.39 (12) | O10—Zn2—N5                               | 104.43 (13) |
| N8 <sup>i</sup> —Zn1—O7  | 94.52 (11)  | O8 <sup>iv</sup> —Zn2—O10                | 95.61 (11)  |
| N8 <sup>i</sup> —Zn1—O1  | 97.04 (11)  | O8 <sup>iv</sup> —Zn2—N9                 | 119.77 (12) |
| O8 <sup>iv</sup> —Zn2—N5 | 110.91 (13) | N5—Zn2—N9                                | 111.09 (13) |

Symmetry codes **1**: (i) x-1, y, z; (ii) x-1, y, z-1; (iii) x+1, y, z; (iv) x+1, y, z+1.

Symmetry codes **2**: (i) x+1, 1/2-y, z+1/2; (ii) x+1, y, 1+z; (iii) 1-x, 1/2+y, 3/2-z; (iv) 1-x, 1-y, 1-z;  
(v) x-1, y, z-1; (vi) 1-x, y-1/2, 3/2-z; (vii) x-1, 1/2-y, z-1/2.

**Table S2.** Hydrogen bonding parameters of **1**.

| $D-H\cdots A$                   | $D-H$ | $H\cdots A$ | $D\cdots A$ | $D-H\cdots A$ |
|---------------------------------|-------|-------------|-------------|---------------|
| O3—H3 $\cdots$ O2               | 0.82  | 1.85        | 2.574 (3)   | 146           |
| O7—H7A $\cdots$ O4              | 0.85  | 2.18        | 3.026 (3)   | 176           |
| O7—H7B $\cdots$ O6 <sup>i</sup> | 0.85  | 2.41        | 3.168 (4)   | 150           |

**Table S3.** Hydrogen bonding parameters of **2**.

| $D-H\cdots A$         | $D-H$ | $H\cdots A$ | $D\cdots A$ | $D-H\cdots A$ |
|-----------------------|-------|-------------|-------------|---------------|
| O13—H13A $\cdots$ O6  | 0.85  | 1.97        | 2.807 (6)   | 167.3         |
| O13—H13B $\cdots$ O14 | 0.85  | 1.97        | 2.816 (10)  | 170.3         |
| O16—H16B $\cdots$ O2  | 0.85  | 2.16        | 2.999(6)    | 166.9         |
| O14—H14A $\cdots$ O15 | 0.85  | 1.81        | 2.62(2)     | 158.5         |
| O17—H17A $\cdots$ O5  | 0.85  | 2.08        | 2.923 (11)  | 173.5         |

**Table S4.** The CIE coordinates of the **1** and **1 @ M<sup>n+</sup>** in maximum emissions of **1** ( $\lambda_{\text{ex}}=323\text{nm}$ ). The CIE coordinates of the **2** and **2 @ M<sup>n+</sup>** in maximum emissions of **2** ( $\lambda_{\text{ex}}=311\text{nm}$ ).

| Compound <b>1</b>          | CIE coordinates | Compound <b>2</b>          | CIE coordinates |
|----------------------------|-----------------|----------------------------|-----------------|
| <b>1 @ Ag<sup>+</sup></b>  | (0.15, 0.06)    | <b>2 @ Ag<sup>+</sup></b>  | (0.16, 0.04)    |
| <b>1 @ Al<sup>3+</sup></b> | (0.15, 0.05)    | <b>2 @ Al<sup>3+</sup></b> | (0.15, 0.02)    |
| <b>1 @ Ca<sup>2+</sup></b> | (0.15, 0.06)    | <b>2 @ Ca<sup>2+</sup></b> | (0.16, 0.04)    |
| <b>1 @ Cd<sup>2+</sup></b> | (0.15, 0.06)    | <b>2 @ Cd<sup>2+</sup></b> | (0.16, 0.04)    |
| <b>1 @ Co<sup>2+</sup></b> | (0.15, 0.06)    | <b>2 @ Co<sup>2+</sup></b> | (0.16, 0.04)    |
| <b>1 @ Cr<sup>3+</sup></b> | (0.15, 0.06)    | <b>2 @ Cr<sup>3+</sup></b> | (0.16, 0.04)    |
| <b>1 @ Cu<sup>2+</sup></b> | (0.15, 0.06)    | <b>2 @ Cu<sup>2+</sup></b> | (0.16, 0.03)    |
| <b>1 @ Fe<sup>3+</sup></b> | (0.15, 0.04)    | <b>2 @ Fe<sup>3+</sup></b> | (0.16, 0.01)    |
| <b>1 @ Hg<sup>2+</sup></b> | (0.15, 0.05)    | <b>2 @ Hg<sup>2+</sup></b> | (0.13, 0.03)    |
| <b>1 @ K<sup>+</sup></b>   | (0.15, 0.06)    | <b>2 @ K<sup>+</sup></b>   | (0.16, 0.04)    |
| <b>1 @ Li<sup>+</sup></b>  | (0.15, 0.06)    | <b>2 @ Li<sup>+</sup></b>  | (0.16, 0.04)    |
| <b>1 @ Mg<sup>2+</sup></b> | (0.15, 0.06)    | <b>2 @ Mg<sup>2+</sup></b> | (0.16, 0.04)    |
| <b>1 @ Mn<sup>2+</sup></b> | (0.15, 0.06)    | <b>2 @ Mn<sup>2+</sup></b> | (0.16, 0.04)    |
| <b>1 @ Ni<sup>2+</sup></b> | (0.15, 0.06)    | <b>2 @ Ni<sup>2+</sup></b> | (0.16, 0.04)    |
| <b>1 @ Pb<sup>2+</sup></b> | (0.15, 0.06)    | <b>2 @ Pb<sup>2+</sup></b> | (0.16, 0.04)    |
| <b>1 @ Zn<sup>2+</sup></b> | (0.15, 0.05)    | <b>2 @ Zn<sup>2+</sup></b> | (0.16, 0.04)    |
| blank                      | (0.15, 0.06)    | blank                      | (0.16, 0.04)    |

**Table S5.** Comparison of detection capacities of **1** towards Fe<sup>3+</sup> ion with other materials.

| Materials                                                                                                    | K <sub>sv</sub> (M <sup>-1</sup> ) | Detection limit           | Ref.      |
|--------------------------------------------------------------------------------------------------------------|------------------------------------|---------------------------|-----------|
| {[Zn <sub>2</sub> (μ <sub>4</sub> -L)(μ <sub>3</sub> -bta(3H <sub>2</sub> O)]·H <sub>2</sub> O} <sub>n</sub> | 1.06×10 <sup>4</sup>               | 1.1 mM                    | 1         |
| {[Zn(L) <sub>0.5</sub> (bimb)]·2H <sub>2</sub> O·0.5(CH <sub>3</sub> ) <sub>2</sub> NH} <sub>n</sub>         | 6.28 ×10 <sup>4</sup>              | 0.48 μM                   | 2         |
| {[Zn(L) <sub>0.5</sub> (btdpe)]·H <sub>2</sub> O} <sub>n</sub>                                               | 4.07 ×10 <sup>4</sup>              | 0.74 μM                   | 2         |
| [Zn <sub>3</sub> (DDB)(DPE)]·H <sub>2</sub> O                                                                | 5.0 ×10 <sup>4</sup>               | 1.8 × 10 <sup>-7</sup> M  | 3         |
| Tb(HL)(H <sub>2</sub> O) <sub>2</sub>                                                                        | 1.37 ×10 <sup>4</sup>              | 7.74 ×10 <sup>-4</sup> mM | 4         |
| [Zn(modbc) <sub>2</sub> ] <sub>n</sub> (Zn-CP)                                                               | 7.20×10 <sup>3</sup>               | 0.57 mM                   | 5         |
| 534-MOF-Tb                                                                                                   | 5.51×10 <sup>3</sup>               | 0.13 mM                   | 6         |
| [Zn(L) <sub>2</sub> ] <sub>n</sub>                                                                           | 1.34×10 <sup>4</sup>               | 2.24 μM                   | 7         |
| Eu <sup>3+</sup> @MIL-53-COOH (Al)                                                                           | 5.12 × 10 <sup>3</sup>             | 0.5 μM                    | 8         |
| Benzimidazole-based sensor                                                                                   | 8.51 × 10 <sup>4</sup>             | 2 μM                      | 9         |
| BUT-14                                                                                                       | 2.17 × 10 <sup>3</sup>             | 3.8 μM                    | 10        |
| BUT-15                                                                                                       | 1.66 × 10 <sup>4</sup>             | 0.8μM                     | 10        |
| Eu <sub>2</sub> (MFDA) <sub>2</sub> (HCOO) <sub>2</sub> (H <sub>2</sub> O) <sub>6</sub>                      | 1.58 × 10 <sup>3</sup>             | 0.3 μM                    | 11        |
| <b>1</b>                                                                                                     | 4.16 × 10 <sup>4</sup>             | 1.66 μM                   | This work |

**Table S6.** Comparison of detection capacities of **2** towards Hg<sup>2+</sup> ion with other materials.

| Materials                                                                   | K <sub>sv</sub> (M <sup>-1</sup> ) | Detection limit          | Ref.      |
|-----------------------------------------------------------------------------|------------------------------------|--------------------------|-----------|
| [Cd(L)(NTA)] <sub>n</sub>                                                   | 3.57×10 <sup>3</sup>               | 3.05 μM                  | 12        |
| [Ni(L)(NPTA)·H <sub>2</sub> O] <sub>n</sub>                                 | 7.43×10 <sup>3</sup>               | 2.29 μM                  | 12        |
| [Cd(2-NH <sub>2</sub> bdc)(tib)·4H <sub>2</sub> O·0.5DMA] <sub>n</sub>      | -                                  | 4.2×10 <sup>-8</sup> M   | 13        |
| {[Cd(BIPA)(tfbdc)(H <sub>2</sub> O)]·DMF} <sub>n</sub>                      | 1.27 × 10 <sup>4</sup>             | 1.2 × 10 <sup>-7</sup> M | 14        |
| RuUiO-67                                                                    | -                                  | 0.5 μM                   | 15        |
| [Zn <sub>2</sub> (bbmb) <sub>2</sub> (tdc) <sub>2</sub> ]·2H <sub>2</sub> O | 4.81×10 <sup>5</sup>               | 0.19 μM                  | 16        |
| TbTATAB                                                                     | -                                  | 4.4 nM                   | 17        |
| <b>2</b>                                                                    | 1.98 × 10 <sup>5</sup>             | 0.23 μM                  | This work |

**Table S7.** The ICP result of polymer **2** with Hg<sup>2+</sup> for 6 hours.

| Polymer <b>2</b>                               | Concentration /μM |
|------------------------------------------------|-------------------|
| Initial value / Hg <sup>2+</sup>               | 0.82              |
| Immersion of Hg <sup>2+</sup> ions for 6 hours | 0.46              |

**Table S8.** The proton conductivity of polymer **1** and **2** at 10 °C with different humidities.

| Relative humidity (% RH) | Polymer <b>1</b> (S·cm <sup>-1</sup> ) | Polymer <b>2</b> (S·cm <sup>-1</sup> ) |
|--------------------------|----------------------------------------|----------------------------------------|
| 45% RH                   | 4.40×10 <sup>-7</sup>                  | 4.68×10 <sup>-7</sup>                  |
| 53% RH                   | 5.51×10 <sup>-7</sup>                  | 5.92×10 <sup>-7</sup>                  |
| 62% RH                   | 5.84×10 <sup>-7</sup>                  | 6.67×10 <sup>-7</sup>                  |
| 71% RH                   | 9.51×10 <sup>-7</sup>                  | 7.51×10 <sup>-7</sup>                  |
| 83% RH                   | 1.68×10 <sup>-6</sup>                  | 8.01×10 <sup>-7</sup>                  |
| 95% RH                   | 7.87×10 <sup>-6</sup>                  | 8.81×10 <sup>-7</sup>                  |

**Table S9.** The proton conductivity of polymer **1** and **2** at 95% RH with different temperature.

| Temperature | Polymer <b>1</b> (S·cm <sup>-1</sup> ) | Polymer <b>2</b> (S·cm <sup>-1</sup> ) |
|-------------|----------------------------------------|----------------------------------------|
| 10°C        | 7.87×10 <sup>-6</sup>                  | 8.81×10 <sup>-7</sup>                  |
| 20°C        | 9.76×10 <sup>-6</sup>                  | 1.49×10 <sup>-6</sup>                  |
| 30°C        | 1.43×10 <sup>-5</sup>                  | 2.21×10 <sup>-6</sup>                  |
| 40°C        | 2.03×10 <sup>-5</sup>                  | 3.69×10 <sup>-6</sup>                  |
| 50°C        | 2.91×10 <sup>-5</sup>                  | 4.79×10 <sup>-6</sup>                  |
| 60°C        | 3.45×10 <sup>-5</sup>                  | 6.26×10 <sup>-6</sup>                  |

**Table S10.** Summarized proton conductivities of some MOFs at high humidity (>80% RH)

| Materials                                                                              | Proton conductivity (S·cm <sup>-1</sup> ) | RH and Temperature (°C) | Ref.      |
|----------------------------------------------------------------------------------------|-------------------------------------------|-------------------------|-----------|
| MIL-53(Fe)(COOH) <sub>2</sub>                                                          | 1.5×10 <sup>-3</sup>                      | 95% and 80              | 18        |
| [Cd(L-tart)-(bpy)(H <sub>2</sub> O)] <sub>n</sub> ·9n(H <sub>2</sub> O)                | 1.3×10 <sup>-6</sup>                      | 95% and 85              | 19        |
| [Cd(D-tart)-(bpy)(H <sub>2</sub> O)] <sub>n</sub> ·9n(H <sub>2</sub> O)                | 1.3×10 <sup>-6</sup>                      | 95% and 85              | 19        |
| [Cd(DL-tart)-(bpy)(H <sub>2</sub> O)] <sub>n</sub> ·6n(H <sub>2</sub> O)               | 4.5×10 <sup>-7</sup>                      | 95% and 85              | 19        |
| {[Gd(L)(Ox)(H <sub>2</sub> O)] <sub>n</sub> ·3H <sub>2</sub> O}                        | 4.7×10 <sup>-4</sup>                      | 95% and 80              | 20        |
| Tb-DSOA                                                                                | 4.0×10 <sup>-4</sup>                      | 98% and 53              | 21        |
| β-PCMOF2                                                                               | 1.8×10 <sup>-6</sup>                      | 85% and 50              | 22        |
| PCMOF2                                                                                 | 2.4×10 <sup>-5</sup>                      | 85% and 50              | 22        |
| PCMOF-3                                                                                | 3.5×10 <sup>-5</sup>                      | 98% and 25              | 23        |
| Sr-SBBA                                                                                | 4.4×10 <sup>-5</sup>                      | 98% and 25              | 24        |
| [La <sub>2</sub> (ox) <sub>3</sub> (H <sub>2</sub> O) <sub>6</sub> ] 4H <sub>2</sub> O | 3.35×10 <sup>-7</sup>                     | 100% and 95             | 25        |
| [Zn <sub>2</sub> (HCOO)(trz) <sub>3</sub> ] <sub>n</sub>                               | 7.95×10 <sup>-7</sup>                     | 98% and 50              | 26        |
| <b>1</b>                                                                               | 3.45×10 <sup>-5</sup>                     | 95% and 60              | This work |
| <b>2</b>                                                                               | 6.26×10 <sup>-6</sup>                     | 95% and 60              | This work |

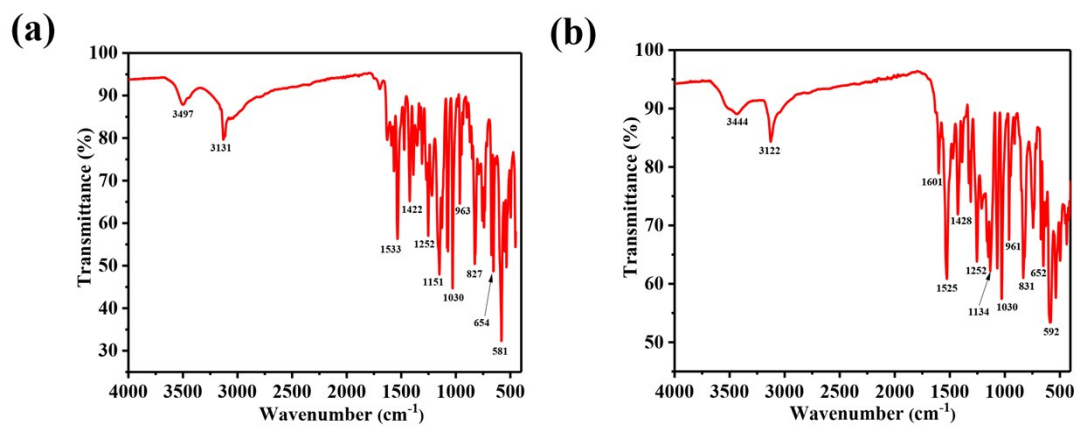

Fig. S1 (a) The IR spectra of 1. (b) The IR spectra of 2.

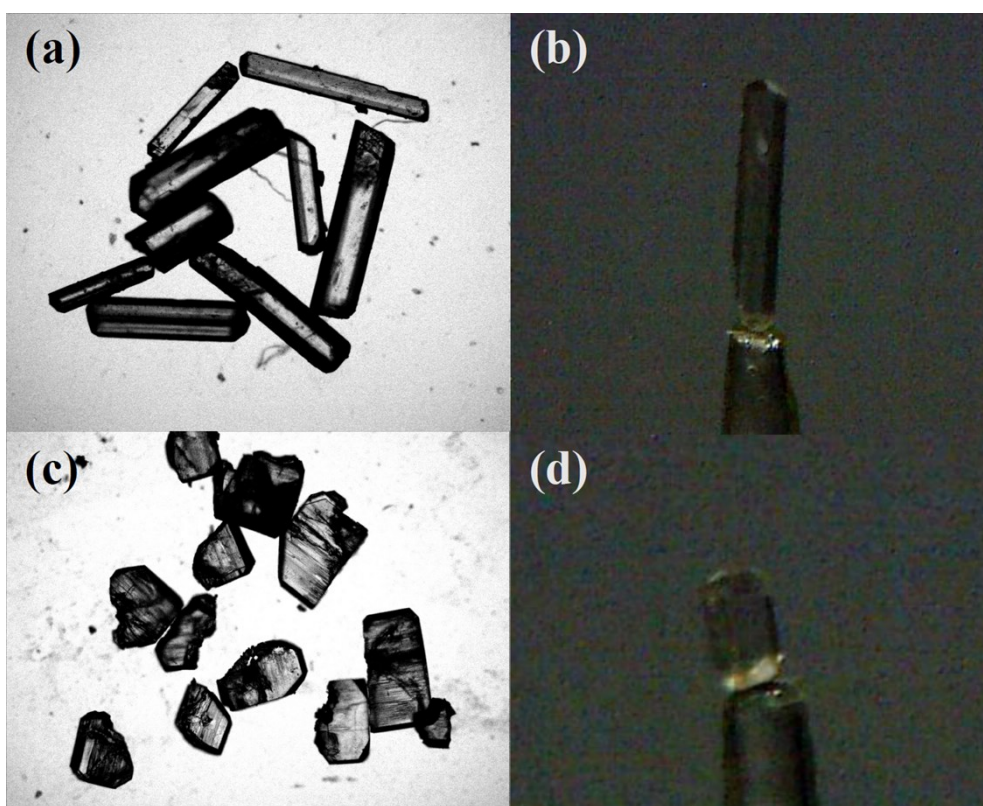

Fig. S2 Sample crystal photographs of polymer 1 (a) and polymer 2 (c). Single-crystal photographs of polymer 1 (b) and polymer 2 (d).

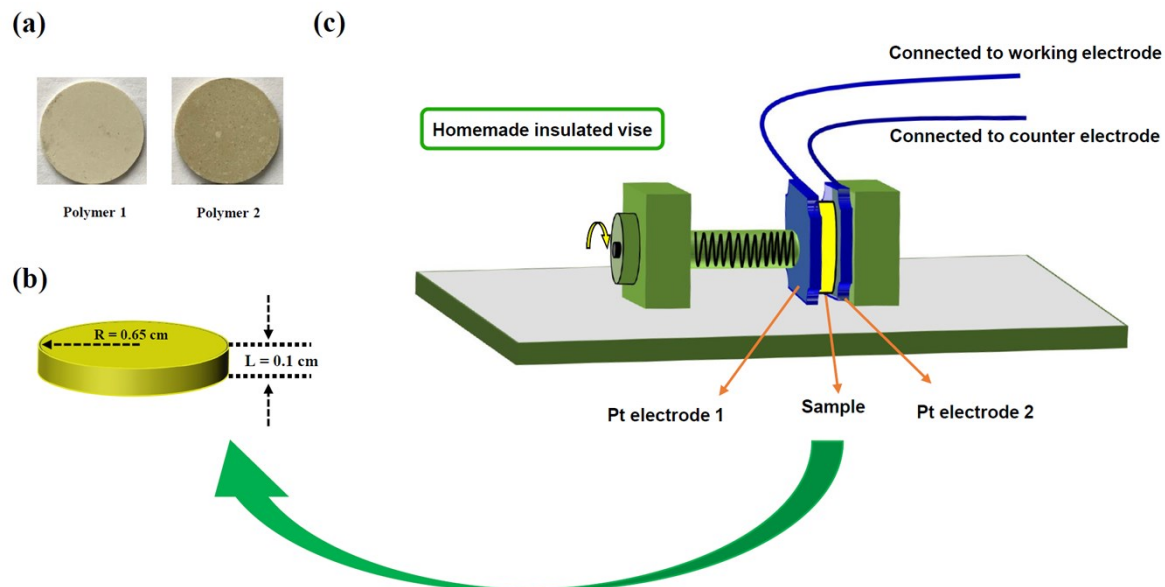

**Fig. S3** (a) Photographs of wafer press plates for polymers 1 and 2; (b) schematic diagram of wafer samples used for proton conductivity; (c) the home-made device for a proton conductivity test.



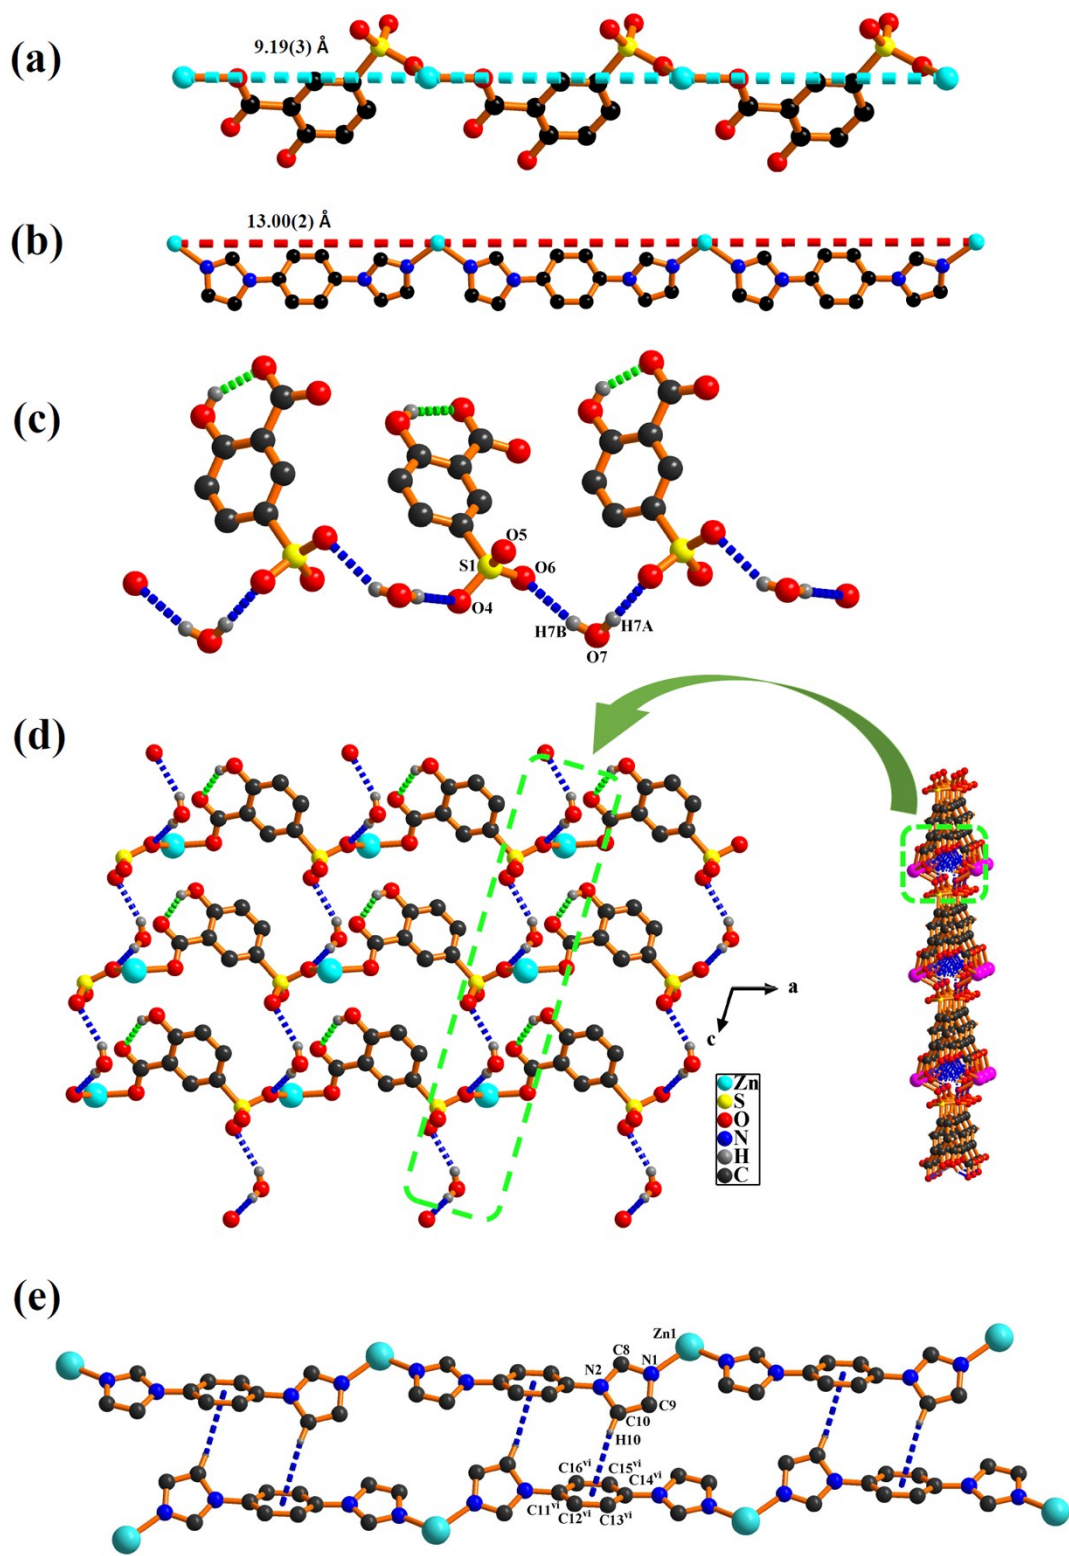

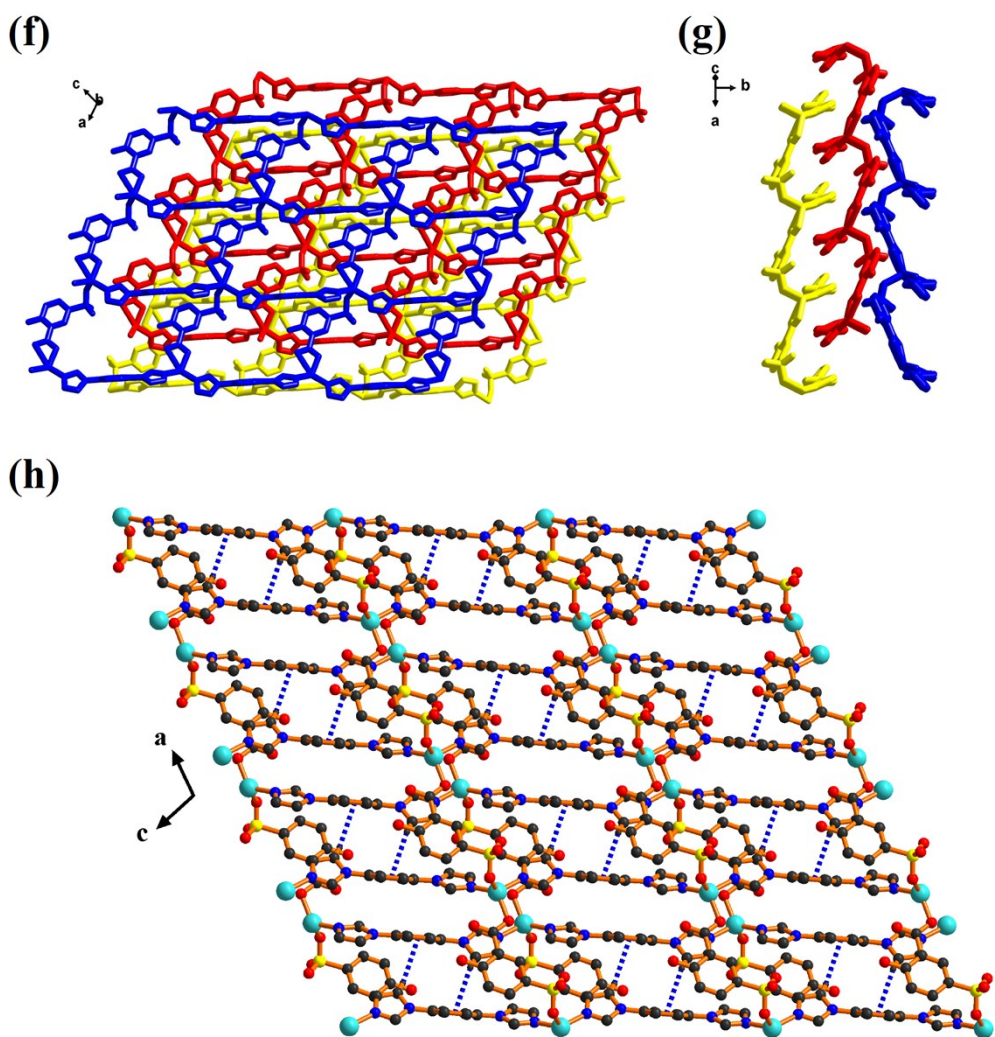

**Fig. S4** (a) The 1D  $[\text{Zn}(\text{H}_3\text{ssa})_n]$  chain in polymer **1**; (b) the 1D  $[\text{Zn}(1,4\text{-bib})_n]$  chain in polymer **1**; (c) the hydrogen-bonded passageway of polymer **1**; (d) the 2D H-bonded framework; (e) the C-H... $\pi$  interactions of polymer **1**; (f) the 3D structure framework of polymer **1** viewed in the direction *b*; (g) the 3D structure framework of polymer **1** viewed in the vertical *b* direction; (h) the 2D C-H... $\pi$  interactions of polymer **1**.

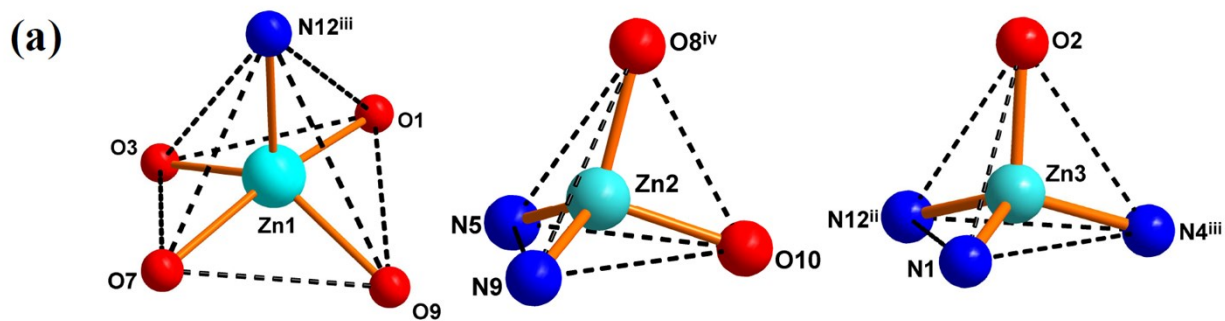

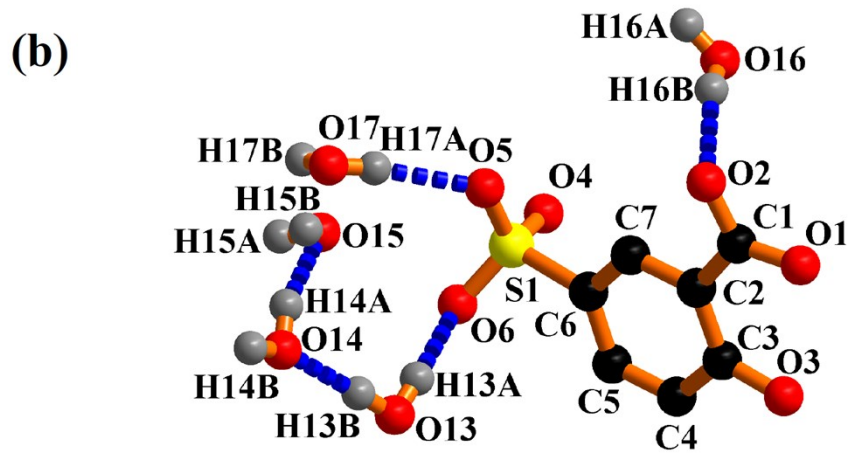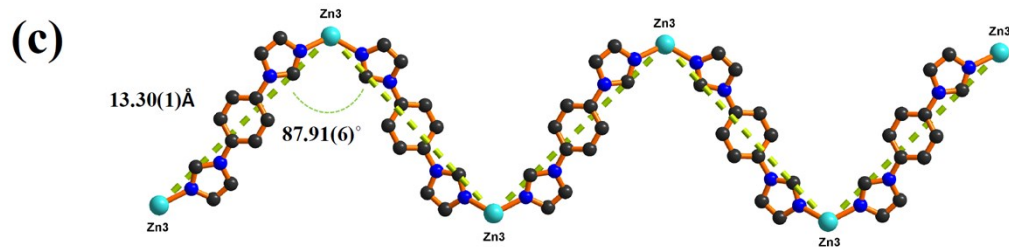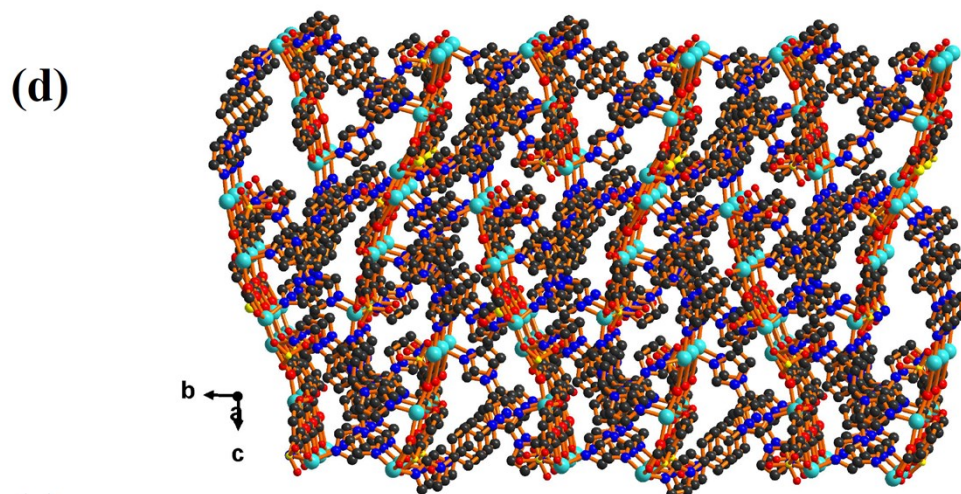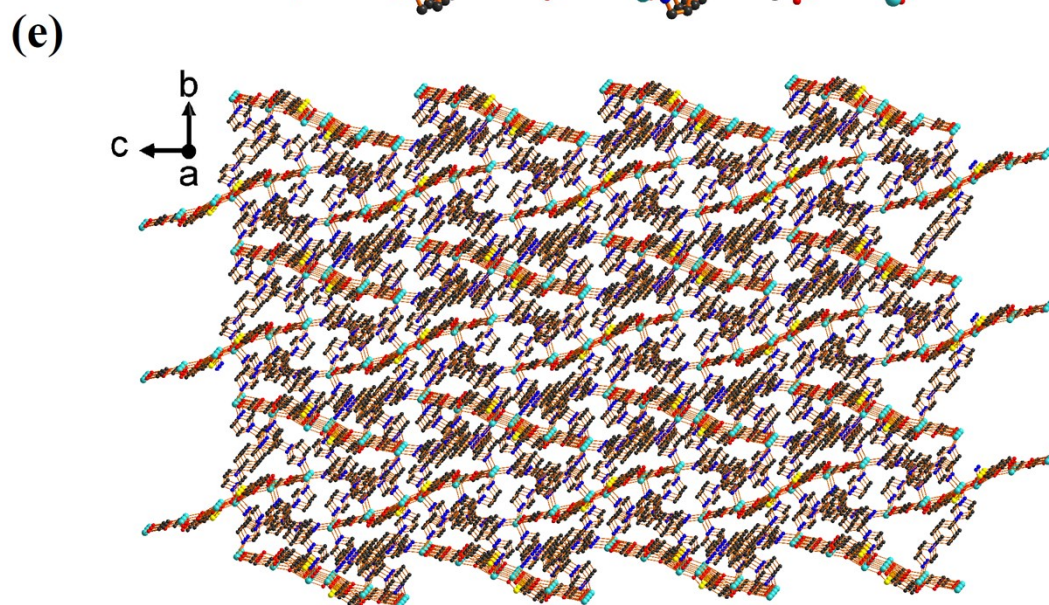

**Fig. S5** (a) Polyhedral view of polymer **2**; (b) The intermolecular O–H···O hydrogen bonds in polymer **2**. (c) the 1D  $[\text{Zn}(1,4\text{-bib})_n]$  chain in polymer **2**; (d) the first simplified method of polymer **2**, and the 3D structural framework corresponding to the topology; (e) the second simplified method of polymer **2**, and the 3D structural framework corresponding to the topology.

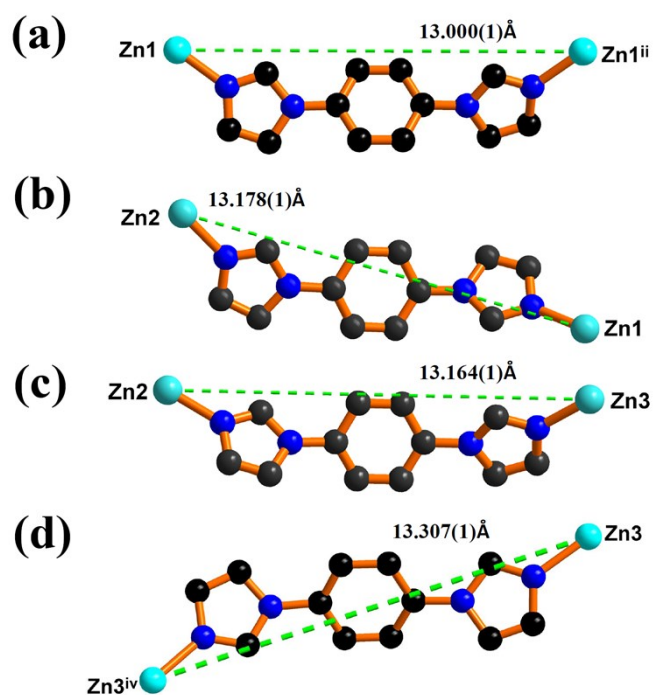

**Fig. S6** (a) The 1,4-bib ligand connector of the polymer **1**; (b-d) the 1,4-bib ligand connector of the polymer **2**.

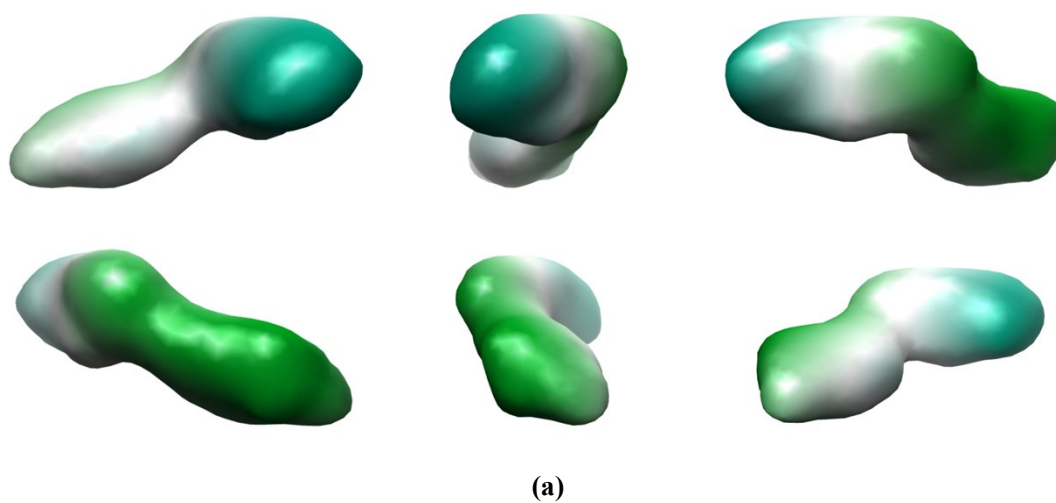

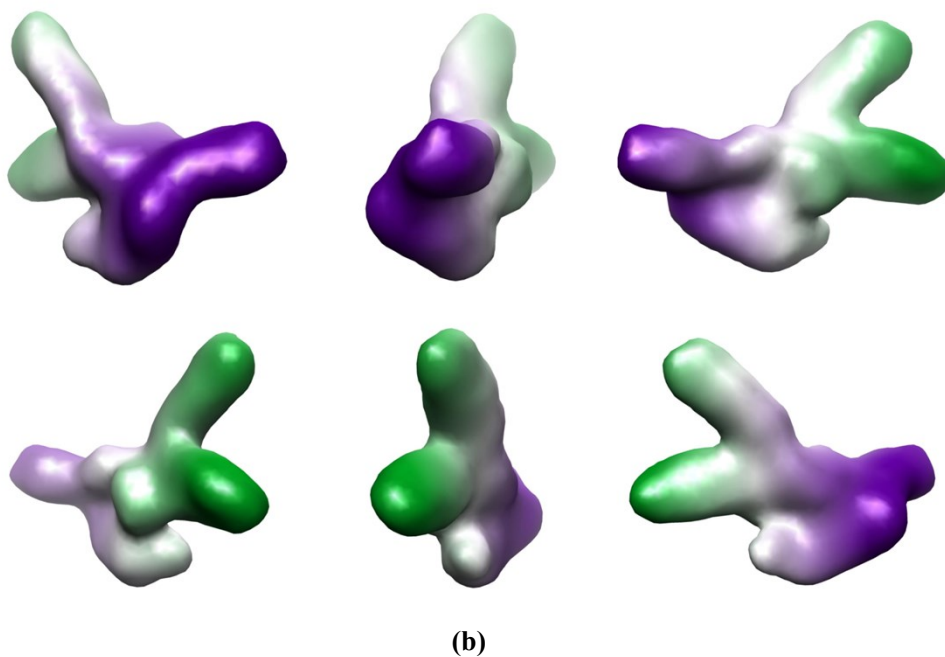

**Fig. S7** The surface of **1** (a) and **2** (b) calculated via 3V Volume Assessor program by rolling a virtual probe (0.8 Å) on the surface viewed along six different orientations.

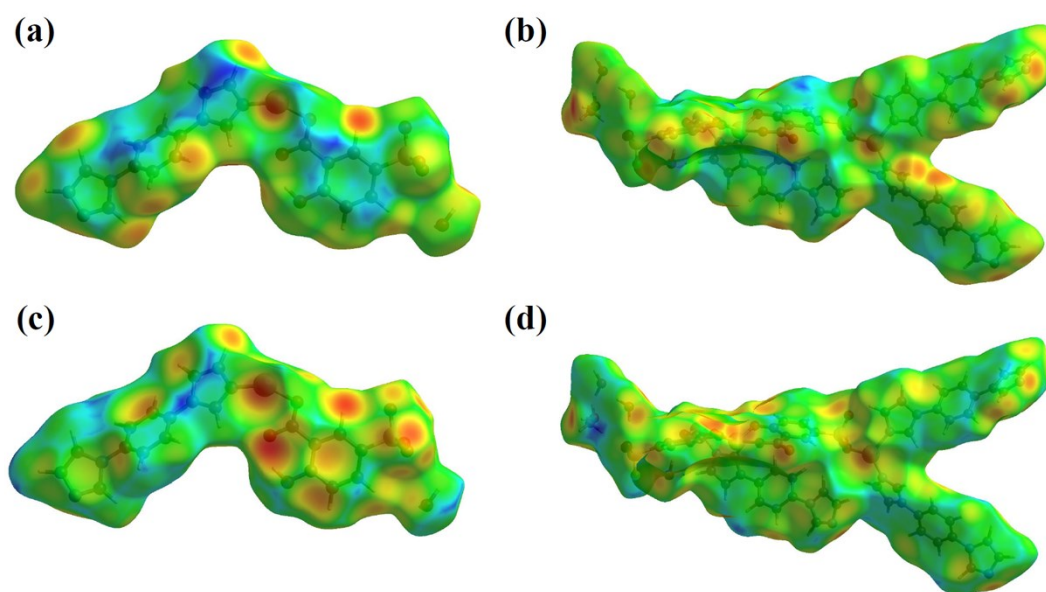

**Fig. S8** Hirshfeld surface of polymer **1** with  $d_i$  (a),  $d_e$  (c) mapped in colour; the Hirshfeld surface of polymer **2** with  $d_i$  (b),  $d_e$  (d) mapped in colour; in all cases, red represents the closest contacts, and blue the most distant contacts.

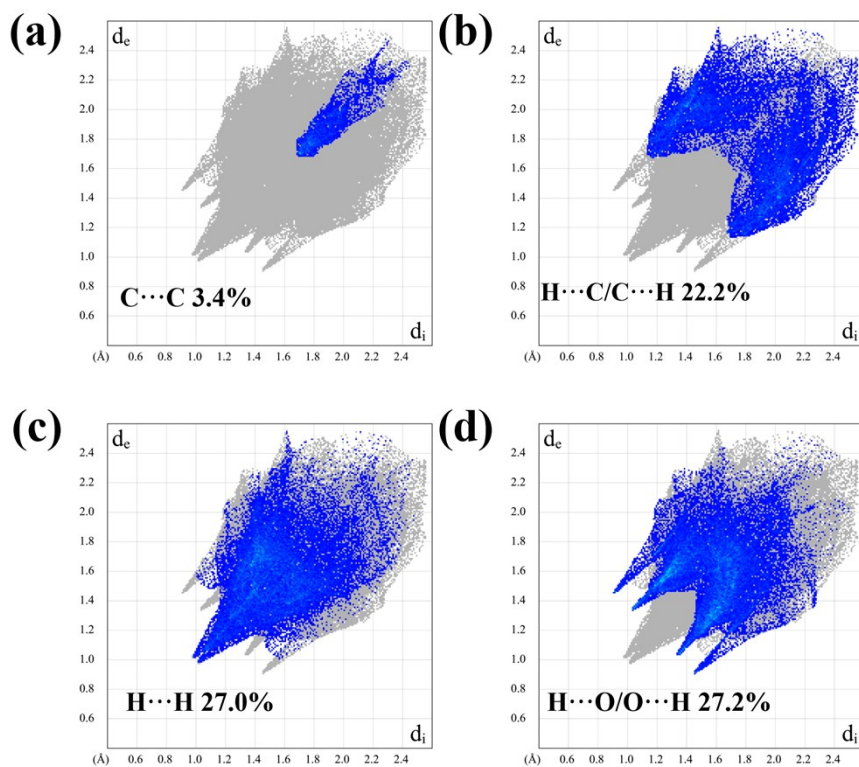

**Fig. S9** Fingerprint plot of polymer **1**: resolved into  $C \cdots C$  (a),  $H \cdots C / C \cdots H$  (b),  $H \cdots H$  (c), and  $H \cdots O / O \cdots H$  (d) contacts showing the percentages of contacts contributed to the total Hirshfeld surface area of the molecule.

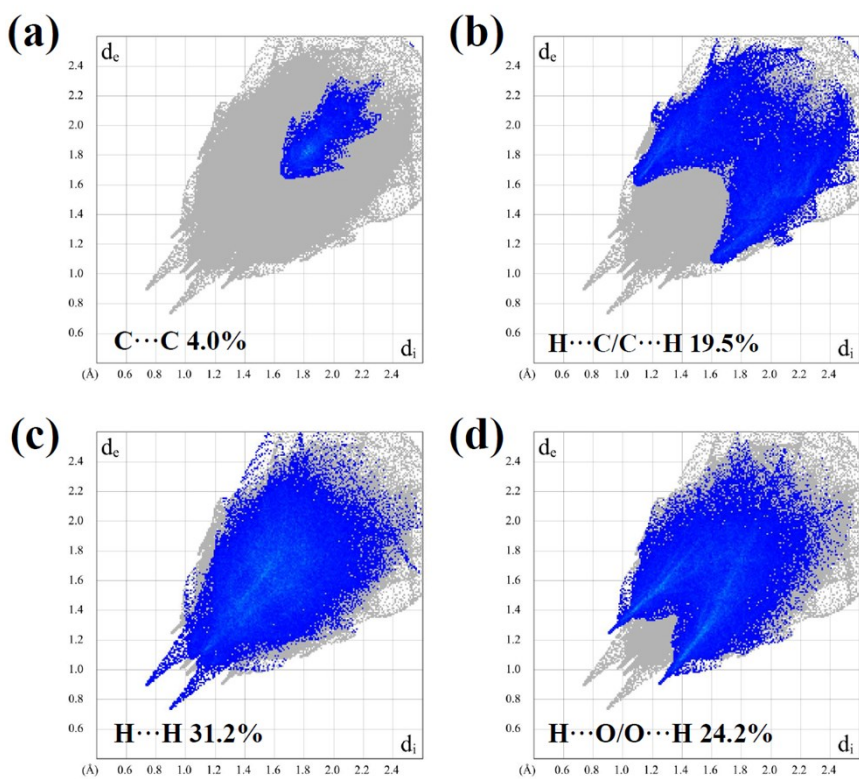

**Fig. S10** Fingerprint plot of polymer **2**: resolved into  $C \cdots C$  (a),  $H \cdots C / C \cdots H$  (b),  $H \cdots H$  (c), and  $H \cdots O / O \cdots H$  (d) contacts showing the percentages of contacts contributed to the total Hirshfeld surface area of the molecule.

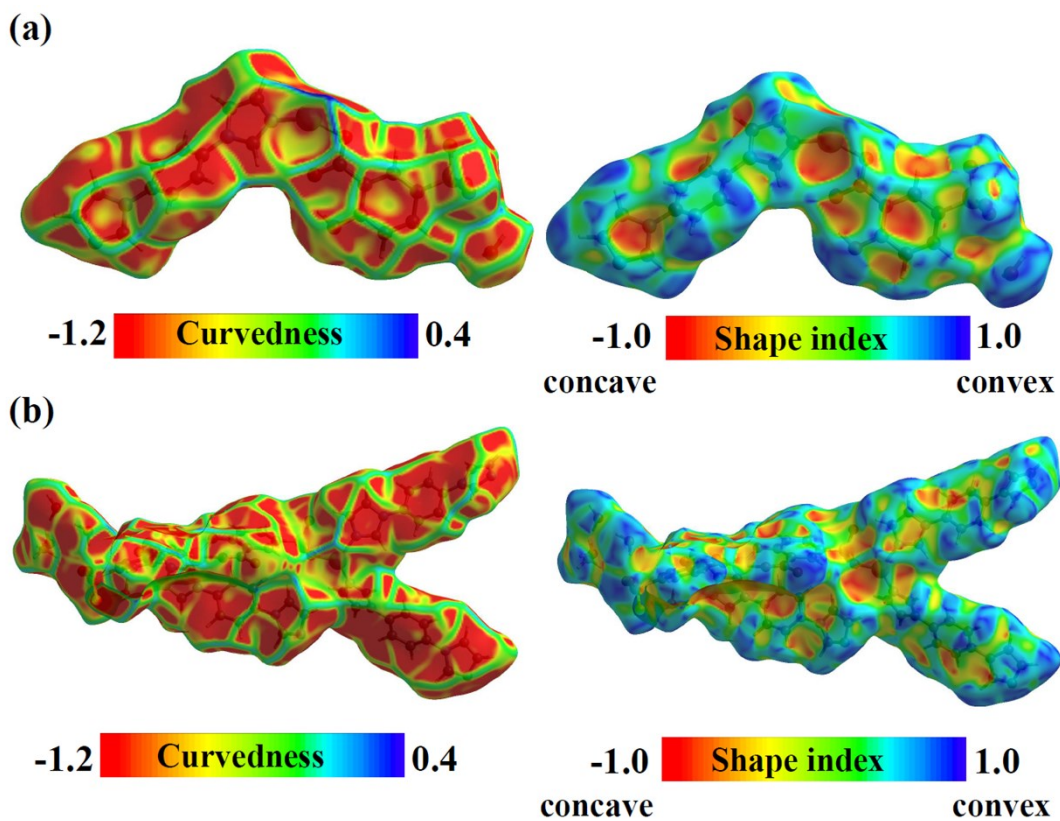

Fig. S11 (a) Hirshfeld surface of polymer 1 with curvedness and shape index mapping; (b) the Hirshfeld surface of polymer 2 with curvedness and shape index mapping.

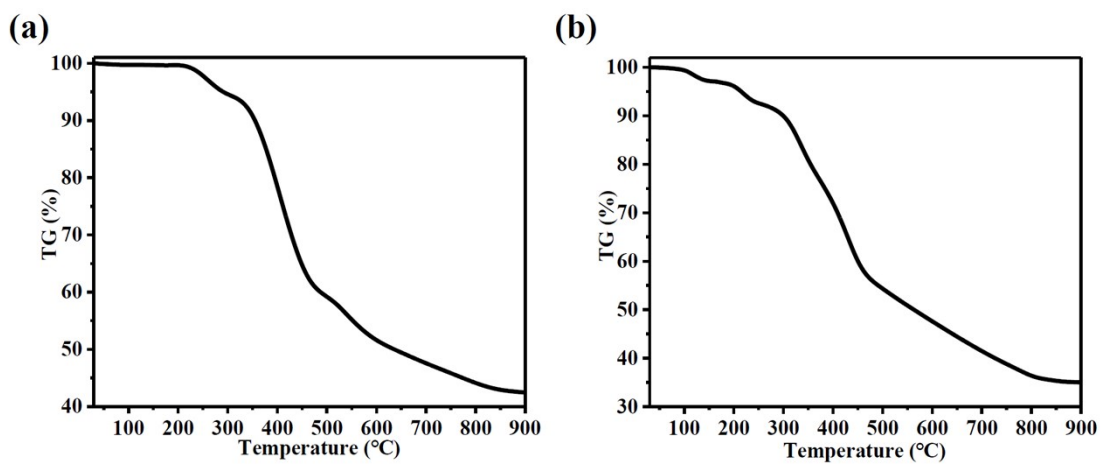

Fig. S12 The TG curves for 1 (a) and 2 (b).

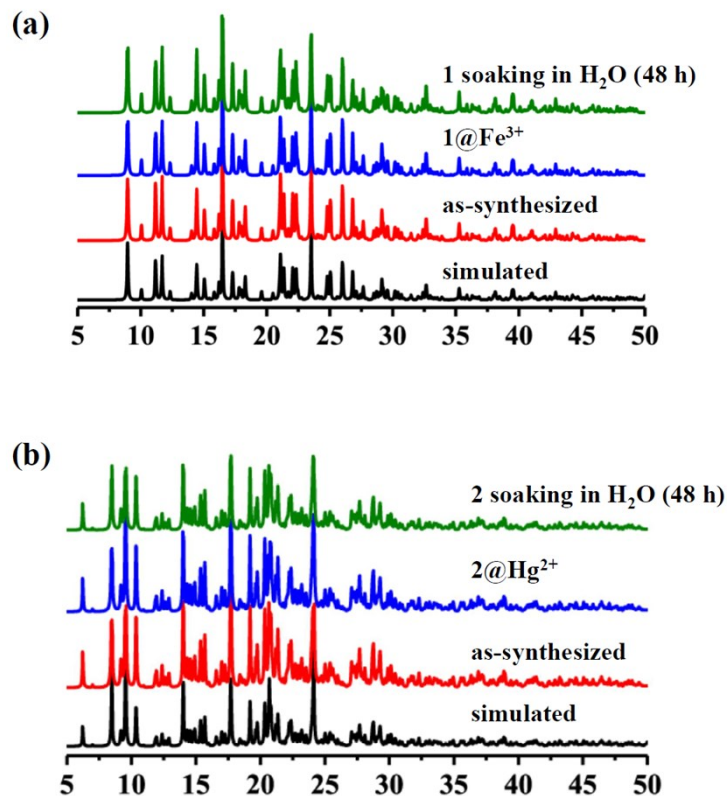

Fig. S13 The PXRD patterns of polymers 1 and 2.

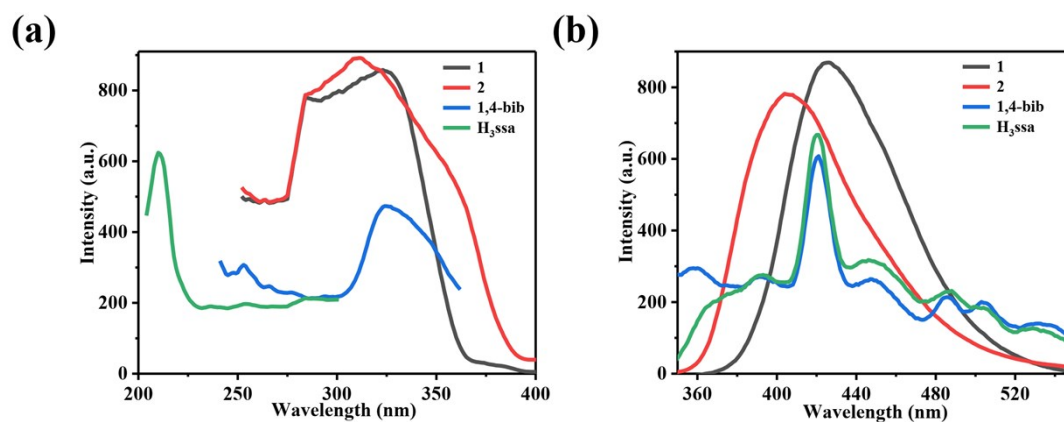

Fig. S14 (a) The solid-state excitation spectra of H<sub>3</sub>ssa ( $\lambda_{\text{ex}} = 210$  nm), 1,4-bib ( $\lambda_{\text{ex}} = 324$  nm), **1** ( $\lambda_{\text{ex}} = 323$  nm), and **2** ( $\lambda_{\text{ex}} = 311$  nm) at room temperature, (b) the solid-state emission spectra of H<sub>3</sub>ssa ( $\lambda_{\text{em}} = 420$  nm), 1,4-bib ( $\lambda_{\text{em}} = 420$  nm), **1** ( $\lambda_{\text{em}} = 425$  nm), and **2** ( $\lambda_{\text{em}} = 405$  nm) at room temperature.



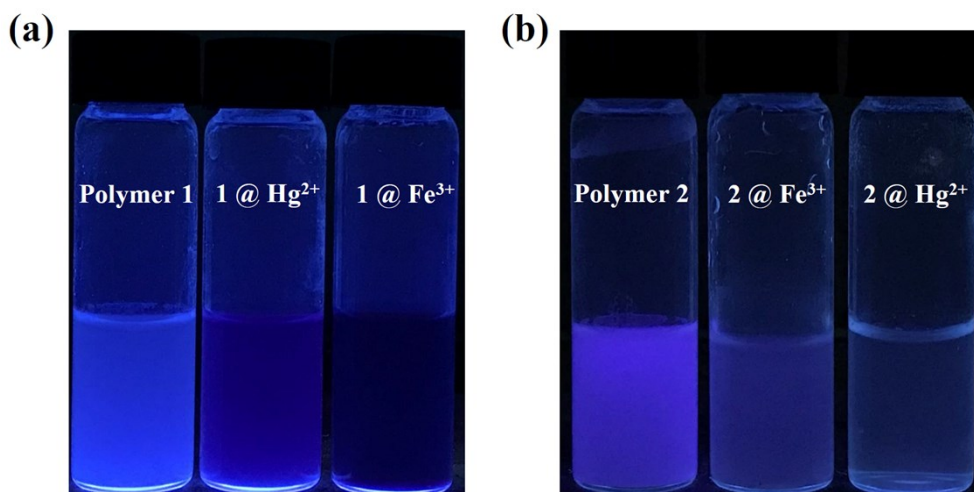

**Fig. S15** (a) The photograph of polymer 1, 1@Hg<sup>2+</sup>, and 1@Fe<sup>3+</sup> samples in water under UV light of 300 nm; (b) the photograph of polymer 2, 2@Fe<sup>3+</sup>, and 2@Hg<sup>2+</sup> samples in water under UV light of 365 nm.

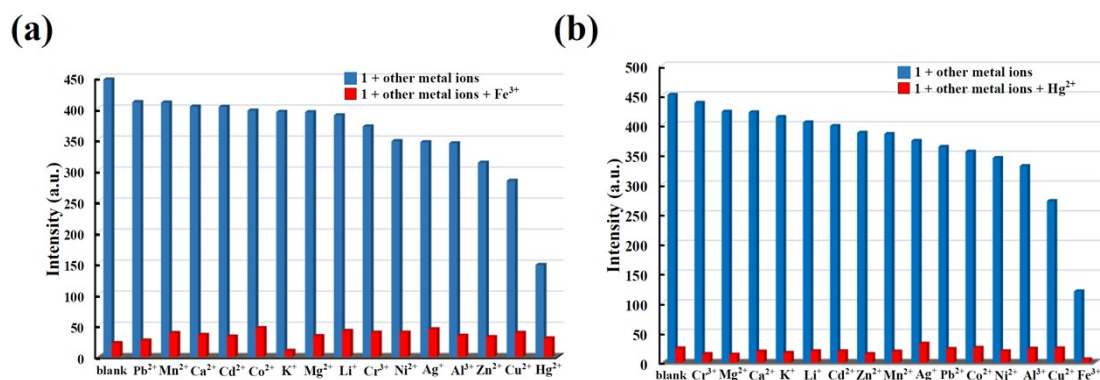

**Fig. S16** (a) The relative emission intensity of polymer 1 before and after addition Fe<sup>3+</sup> (1.5ml, 10<sup>-3</sup> M) and other metal ions (1.5ml, 10<sup>-3</sup> M); (b) the relative emission intensity of polymer 2 before and after addition Hg<sup>2+</sup> (1.5ml, 10<sup>-3</sup> M) and other metal ions (1.5ml, 10<sup>-3</sup> M).

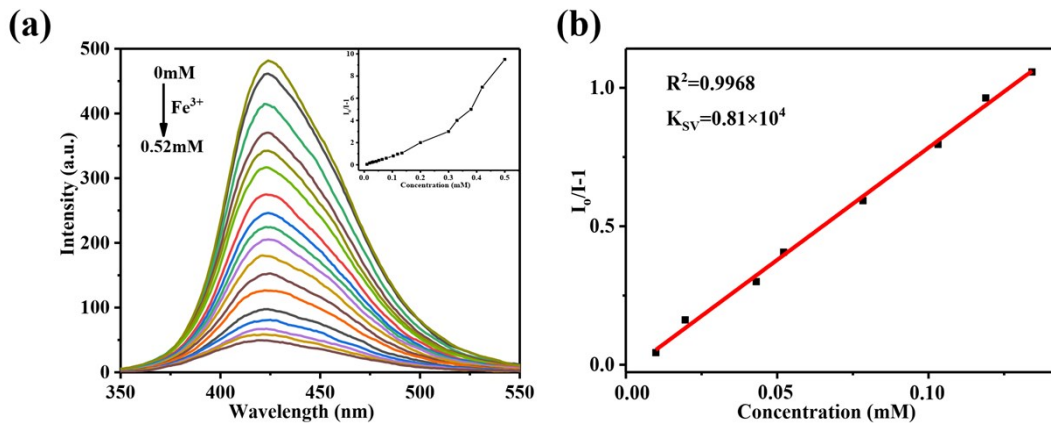

**Fig. S17** (a) Fluorescent spectra of polymer **1** in simulated biological systems in the presence of different concentrations of  $\text{Fe}^{3+}$  at  $37^\circ\text{C}$ ; (b) emission quenching linearity relationship at low concentrations of  $\text{Fe}^{3+}$  ion for polymer **1** in simulated biological systems.

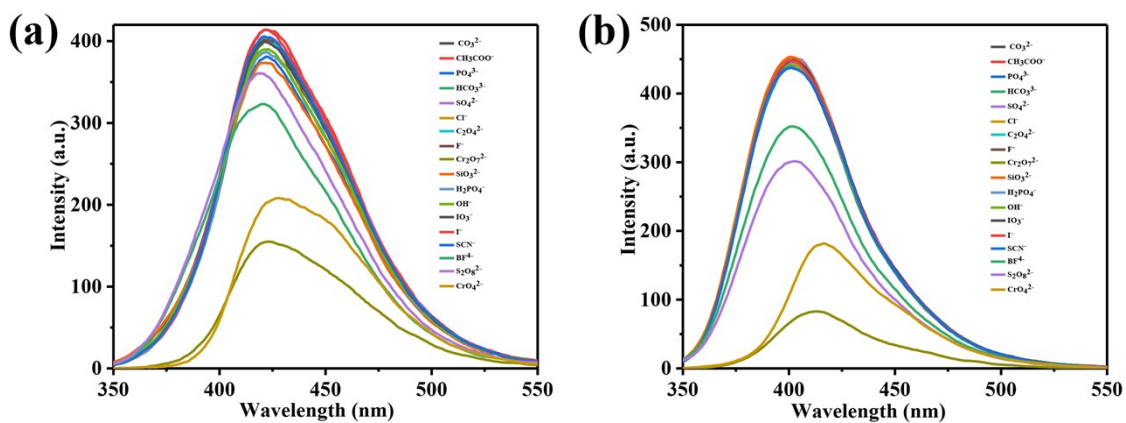

**Fig. S18** The photoluminescence spectra for polymer **1** (a) and **2** (b) in aqueous solution with various anions.

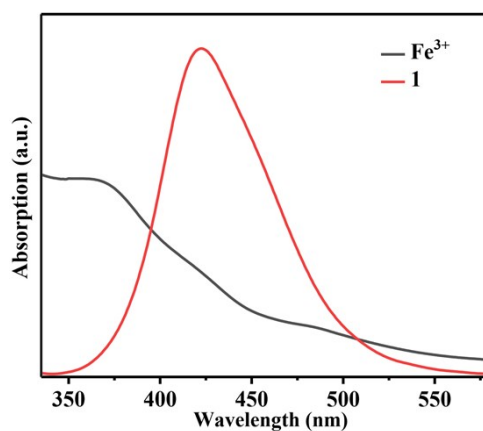

**Fig. S19** UV-Vis absorption spectra of  $\text{Fe}^{3+}$  in aqueous solution.

the emission spectrum of polymer **1** dispersed in water upon excitation of 323 nm.

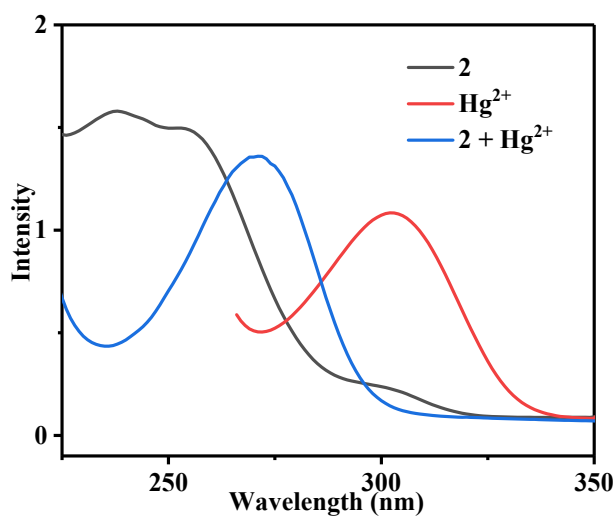

Fig. S20 UV-vis spectra of polymer **2** before and after addition of  $\text{Hg}^{2+}$  ion.

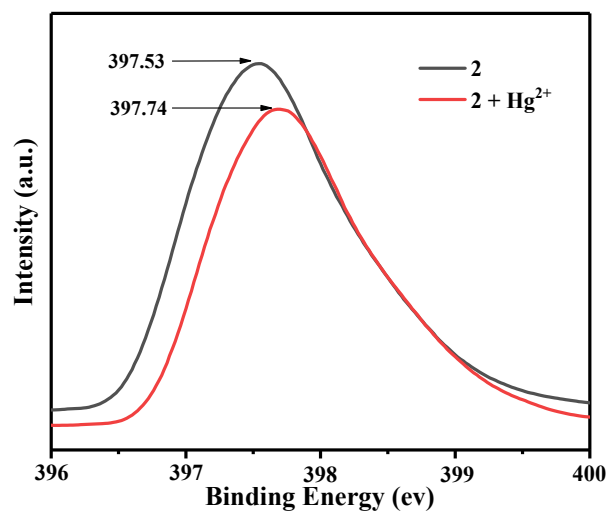

Fig. S21 N 1s XPS spectra of polymer **2** before and after immersed in  $\text{Hg}^{2+}$  ion.

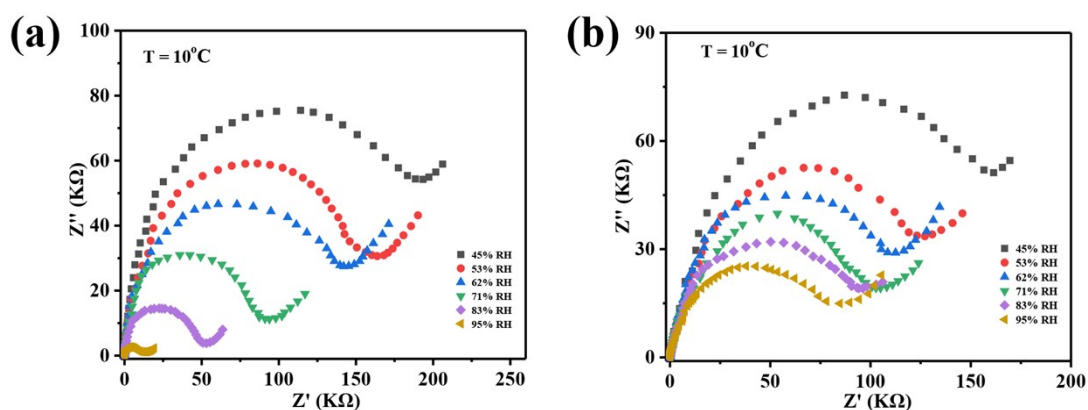

Fig. S22 (a) The Nyquist plots for polymer **1** at  $10^\circ\text{C}$  at different relative humidity; (b) the Nyquist plots for polymer **2** at  $10^\circ\text{C}$  at different relative humidity.

**Detection limit calculation process:**

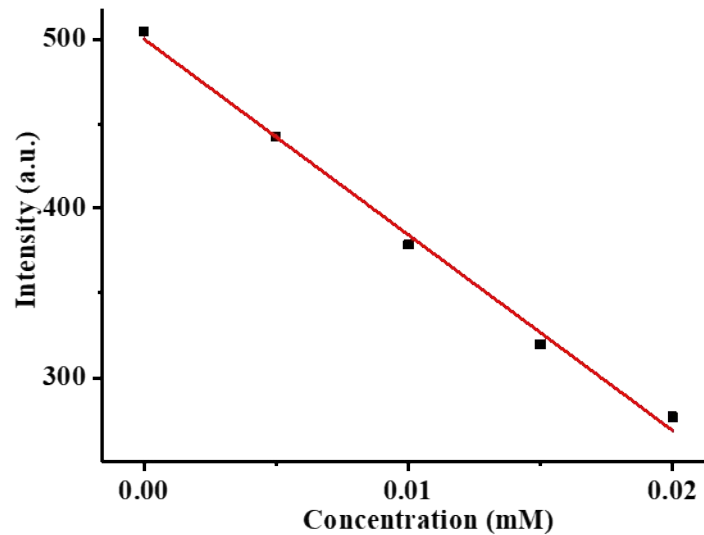

(a) Corresponding Stern-Volmer plot for polymer **1** when  $\text{Fe}^{3+}$  ions are added

Linear Equation:  $Y = -11566.87X + 506.7$

$$k = 1.1567 \times 10^7 \text{ M}^{-1}$$

$$I_a = \frac{498.3 + 505.1 + 492.9 + 496.2 + 508.7 + 500.1 + 513.1 + 502.7 + 507.9 + 497.2}{10} = 502.22$$

$$S = \sqrt{\frac{\sum (I_0 - I_a)^2}{N - 1}} = 6.41 \quad (N=10)$$

$$\text{LOD} = \frac{3 \times S}{k} = \frac{3 \times 6.41}{1.1567 \times 10^7} = 1.66 \mu\text{M}$$

$k$  is the slope of the calibration curve,  $I_0$  is the measured luminescence intensity of polymer **1** in deionized water,  $I_a$  is the average of 10 blank samples tested.  $S$  is the standard deviation of the blank group, LOD is the detection limit.

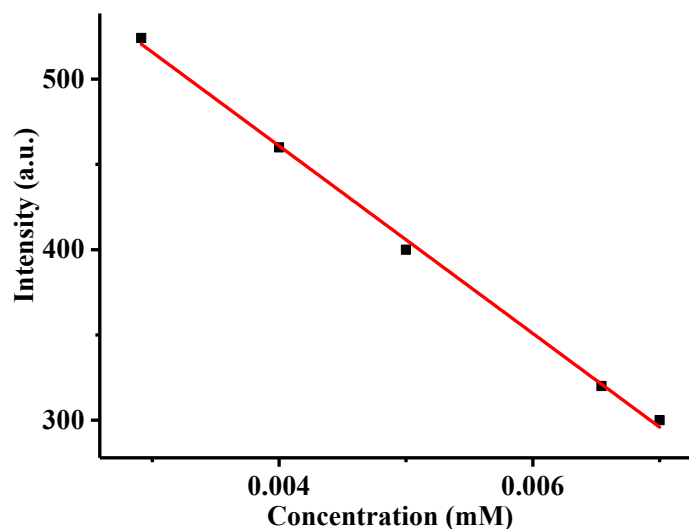

(b) Corresponding Stern-Volmer plot for polymer **2** when  $\text{Hg}^{2+}$  ions are added

Linear Equation:  $Y = -54978.79X + 578.7$

$$k=5.4979 \times 10^7 \text{ M}^{-1}$$

$$I_a = \frac{581.2 + 579.8 + 575.4 + 580.1 + 578.2 + 577.4 + 576.2 + 578.1 + 566.7 + 580.2}{10} = 577.33$$

$$S = \sqrt{\frac{\sum (I_0 - I_a)^2}{N - 1}} = 4.17 \quad (N=10)$$

$$\text{LOD} = \frac{3 \times S}{k} = \frac{3 \times 4.17}{5.4979 \times 10^7} = 0.23 \text{ } \mu\text{M}$$

$k$  is the slope of the calibration curve,  $I_0$  is the measured luminescence intensity of polymer **2** in deionized water,  $I_a$  is the average of 10 blank samples tested.  $S$  is the standard deviation of the blank group, LOD is the detection limit.

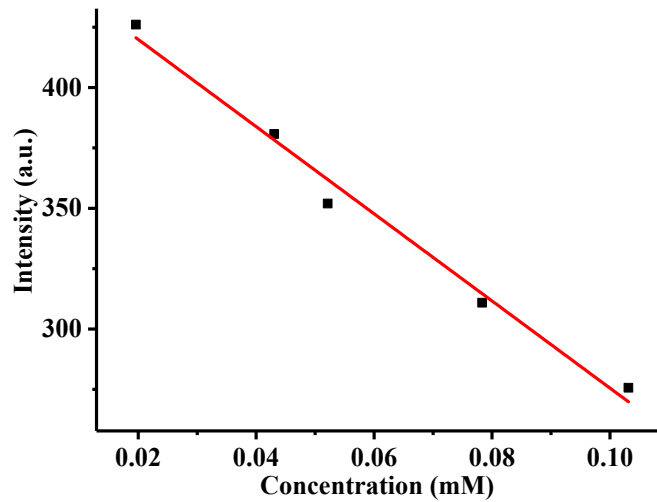

(c) Corresponding Stern-Volmer plot for polymer **1** when  $\text{Fe}^{3+}$  ions are added in biological systems

$$\text{Linear Equation: } Y = -1804.69X + 495.2$$

$$k = 1.80469 \times 10^6 \text{ M}^{-1}$$

$$I_a = \frac{499.7 + 490.2 + 500.1 + 495.4 + 492.3 + 497.4 + 494.5 + 498.1 + 499.4 + 489.7}{10} = 495.68$$

$$S = \sqrt{\frac{\sum (I_0 - I_a)^2}{N - 1}} = 3.90 \quad (N=10)$$

$$\text{LOD} = \frac{3 \times S}{k} = \frac{3 \times 3.90}{1.80469 \times 10^6} = 6.48 \text{ } \mu\text{M}$$

$k$  is the slope of the calibration curve,  $I_0$  is the measured luminescence intensity of polymer **1** in HEPES,  $I_a$  is the average of 10 blank samples tested.  $S$  is the standard deviation of the blank group,

LOD is the detection limit.

## References

- 1 Y. X. Yang, S. Y. Xia, H. X. Zhang, H. H. Niu, W. J. Dong and X. X. Wu, *J. Solid State Chem.*, 2020, **284**, 121180.
- 2 C. G. Xu, C. F. Bi, Z. Zhu, R. Luo, X. Zhang, D. M. Zhang, C. B. Fan, L. S. Cui and Y. H. Fan, *CrystEngComm*, 2019, **21**, 2333-2344.
- 3 X.-Q. Wang, D.-D. Feng, J. Tang, Y.-D. Zhao, J. Li, J. Yang, C. K. Kim and F. Su, *Dalton Trans.*, 2019, **48**, 16776-16785.
- 4 X. M. Hou, C.-C. Yan, X. L. Xu, A.-Q. Liang, Z.-W. Song and S.-F. Tang, *Dalton Trans.*, 2020, **49**, 3809-3815.
- 5 Y. D. Wu, D. Y. Liu, M. H. Lin and J. Qian, *Rsc Adv.*, 2020, **10**, 6022-6029.
- 6 M. Chen, W.-M. Xu, J.-Y. Tian, H. Cui, J.-X. Zhang, C.-S. Liu and M. Du, *J. Mater. Chem. C*, 2017, **5**, 2015-2021.
- 7 T.-Y. Xu, H.-J. Nie, J.-M. Li and Z.-F. Shi, *J. Solid State Chem.*, 2020, 121342.
- 8 Y. Zhou, H. -H. Chen and B. Yan, *J. Mater. Chem. A*, 2014, **2**, 13691-13697.
- 9 M. Wang, J. G. Wang, W. J. Xue and A. X. Wu, *Dyes Pigments*, 2013, **97**, 475-480.
- 10 B. Wang, Q. Yang, C. Guo, Y. X. Sun, L.-H. Xie and J.-R. Li, *Acs Appl. Mater. Inter.*, 2017, **9**, 10286-10295.
- 11 X.-H. Zhou, L. Li, H.-H. Li, A. Li, T. Yang and W. Huang, *Dalton Trans.*, 2013, **42**, 12403-12409.
- 12 H. Zhu, C. Han, Y.-H. Li and G.-H. Cui, *J. Solid State Chem.*, 2020, **282**, 121132.
- 13 L. L. Wen, X. F. Zheng, K. L. Lv, C. G. Wang and X. Y. Xu, *Inorg. Chem.*, 2015, **54**, 7133-7135.
- 14 Z.-J. Wang, F.-Y. Ge, G.-H. Sun and H.-G. Zheng, *Dalton Trans.*, 2018, **47**, 8257-8263.
- 15 Z. Wang, J. Yang, Y. S. Li, Q. X. Zhuang and J. L. Gu, *Dalton Trans.*, 2018, **47**, 5570-5574.
- 16 W.-C. Kang, C. Han, D. Liu and G.-H. Cui, *Inorg. Chem. Commun.*, 2019, **106**, 81-85.
- 17 T. F. Xia, T. Song, G. G. Zhang, Y. J. Cui, Y. Yang, Z. Y. Wang and G. D. Qian, *Chem-Eur. J.*, 2016, **22**, 18429-18434.

- 18 A. Shigematsu, T. Yamada and H. Kitagawa, *J. Am. Chem. Soc.*, 2011, **133**, 2034-2036.
- 19 S. Parshamoni, H. S. Jena, S. Sanda and S. Konar, *Inorg. Chem. Front.*, 2014, **1**, 611-620.
- 20 S. Biswas, J. Chakraborty, V. Singh Parmar, S. P. Bera, N. Ganguli and S. Konar, *Inorg. Chem.*, 2017, **56**, 4956-4965.
- 21 X.-Y. Dong, R. Wang, J.-Z. Wang, S.-Q. Zang and T. C. Mak, *J. Mater. Chem. A*, 2015, **3**, 641-647.
- 22 S. Kim, K. W. Dawson, B. S. Gelfand, J. M. Taylor and G. K. Shimizu, *J. Am. Chem. Soc.*, 2013, **135**, 963-966.
- 23 J. M. Taylor, R. K. Mah, I. L. Moudrakovski, C. I. Ratcliffe, R. Vaidhyanathan and G. K. Shimizu, *J. Am. Chem. Soc.* 2010, **132**, 14055-14057.
- 24 T. Kundu, S. C. Sahoo and R. Banerjee, *Chem. Commun.*, 2012, **48**, 4998-5000.
- 25 R. Ishikawa, S. Ueno, S. Yagishita, H. Kumagai, B. K. Breedlove and S. Kawata, *Dalton Trans.*, 2016, **45**, 15399-15405.
- 26 J. N. Lu, S. F. Zhou, S. J. Zhang, C. X. Zhang and Q. L. Wang, *Eur. J. Inorg. Chem.*, 2019, **2019**, 794-799.
